## RETRACTION

# Retraction: Whale jaw joint is a shock absorber

**Alexander J. Werth and Haruka Ito**

The authors are retracting *Journal of Experimental Biology* (2020) **223**, jeb211904 (doi:10.1242/jeb.211904).

The authors no longer have full confidence in their results because of inconsistencies in data collection. Technical issues led to unreliable data recording, which then led to erroneous calculations that affected the results published in the paper.

As the paper was featured in the Inside JEB section, the associated Inside JEB article has also been retracted (doi:10.1242/jeb.230771).

The authors apologise to readers for any inconvenience caused.
